# Supplementary material
Source: publisher site journal article supplement (https://www.spandidos-publications.com/6683/downloadSupplementary)
Supplement: Supplementary file 1 [file downloadSupplementary]

Table SI. Final diagnosis based on PET/CT findings (true-positive group).

| A, Infection                   |                                                                   |                                                  |
|--------------------------------|-------------------------------------------------------------------|--------------------------------------------------|
| Case no.                       | FDG PET/CT findings                                               | Final diagnosis                                  |
| 1                              | Abnormal uptake in the SVC and junction of right atrium           | Central line-associated blood stream infection   |
| 2                              | Uptake in the bowl anastomosis                                    | Bowl infection                                   |
| 3                              | Uptake in the pelvis                                              | Pelvic infection                                 |
| 4                              | FDG uptake in spine                                               | Discitis/osteomyelitis                           |
| 5                              | FDG uptake in Foot and ankle joints                               | Diabetic foot infection                          |
| 6                              | FDG uptake in the porta hepatis and per-hepatic lymph nodes       | Cholangitis                                      |
| 7                              | Focal FDG uptake in the liver                                     | Hepatic abscess                                  |
| 8                              | FDG uptake in the peri-renal area                                 | Peri-renal abscess                               |
| 9                              | Mediastinal, pluraland lung uptake                                | Mediastinitis and pleuritis                      |
| 10                             | Focal intense uptake in the renal cortex and perinephric tissue   | Pyelonephritis and urospepsis                    |
| 11                             | focal uptake in the heart valve and myocardium                    | Infective endocarditis                           |
| 12                             | FDG uptake in the sacrum                                          | Osteomyelitis                                    |
| 13                             | FDG uptake in gall bladder and adjacent hepatic segment           | Cholecystitis                                    |
| 14                             | Lung and pleural uptake                                           | Chest infection                                  |
| 15                             | Soft plate and cervical lymph nodes                               | Head and neck infection                          |
| 16                             | Post kidney transplant uptake the kidney and peri-ureteric uptake | Pyelonephritis                                   |
| 17                             | FDG uptake in the spinal cord                                     | Neurobrucellosis                                 |
| 18                             | Uptake in the lung                                                | Pneumonitis                                      |
| 19                             | Focal FDG uptake in the liver                                     | Liver abscess                                    |
| 20                             | FDG uptake in the sacroiliac joint                                | Osteomyelitis                                    |
| 21                             | FDG in multiple vertebra and discs                                | Osteomyelitis                                    |
| 22                             | FDG uptake in the Para-spinal tissue and lung                     | Spine osteomyelitis                              |
| 23                             | Spleen and multiple lymph nodes uptake                            | Disseminated histoplasmosis                      |
| 23                             | Vertebral uptake                                                  | Brucellosis                                      |
| 25                             | Ascending aorta uptake                                            | Infectedaorticaneurysm                           |
| 26                             | FDG uptake in the right adnexa                                    | Ovarian abscess                                  |
| B, Malignancies                |                                                                   |                                                  |
| Case no.                       | FDG PET/CT findings                                               | Final diagnosis                                  |
| 1                              | FDG uptake in the lung and Para-spinal region                     | Acute myeloid leukemia                           |
| 2                              | Uptake in bilateral cervical nodes                                | Hodgkin's lymphoma                               |
| 3                              | Asymmetricaltonsils uptake                                        | Tonsillar cancer                                 |
| 4                              | FDG uptake above and below the diaphragm                          | Large diffuse B-cell lymphoma                    |
| 5                              | Multiple foci of FDG uptake throughout the Skelton                | Metastaticadenocarcinoma                         |
| 6                              | Lymph nodes above and below diaphragm                             | Non-Hodgkin's lymphoma                           |
| 7                              | Uptake in the spleen and bone marrow                              | Hodgins's lymphoma                               |
| 8                              | Breast uptake                                                     | Breast cancer                                    |
| 9                              | Uptake in the liver, porta hepatic, and mediastinal lymph nodes   | Metastatic fibrolamellar hepatocellularcarcinoma |
| 10                             | FGD uptake in the spleen and bone marrow                          | Lymphoma                                         |
| 11                             | FDG uptake in the uterus and iliac nodes                          | Endometrial cancer                               |
| 12                             | Multiple lymph nodes uptake                                       | Non-Hodgins lymphoma                             |
| 13                             | Focal uptake in the colon                                         | Colon cancer                                     |
| 14                             | Focal uptake in the stomach                                       | Gastric adenocarcinoma                           |
| 15                             | Bone marrow uptake                                                | Acute ALL                                        |
| 16                             | Focal uptake in the testis                                        | Testicular lymphoma                              |
| 17                             | Heterogeneous uptake in the mediastinal mass                      | Lymphoma                                         |
| 18                             | Multiple bone metastasis and nasopharyngeal uptake                | Metastaticnasopharyngeal cancer                  |
| C, Inflammatory/non-infectious |                                                                   |                                                  |
| Case no.                       | FDG PET/CT findings                                               | Final diagnosis                                  |
| 1                              | Uptake in the ascending aorta                                     | IgG4-related disease                             |

|   |                                             |                            |
|---|---------------------------------------------|----------------------------|
| 2 | Focal myocardial uptake                     | Sarcoidosis                |
| 3 | Diffuse thyroid uptake                      | Thyroiditis                |
| 4 | Diffuse pericardial uptake                  | Pericarditis               |
| 5 | Diffuse bone marrow and lymph nodes uptake  | Still disease              |
| 6 | Aortic and aortic arch branches wall uptake | Giant cell arteritis       |
| 7 | Diffuse bowel uptake                        | Inflammatory bowel disease |

---

ALL, acute myeloid leukemia; FDG PET/CT, fluorodeoxyglucose positron emission tomography.
